# Supplementary material for: Association of Obesity with Onset of Puberty and Sex Hormones in Chinese Girls: A 4-Year Longitudinal Study
Source: PubMed Central journal article supplement (PMC4527677; doi:10.1371/journal.pone.0134656), 2015-08-06
Supplement: pone.0134656.s002.pdf [file pone.0134656.s002.pdf]

| Variable name | legend                                                                                                                                                                                                                           |
|---------------|----------------------------------------------------------------------------------------------------------------------------------------------------------------------------------------------------------------------------------|
| number        | Personal number                                                                                                                                                                                                                  |
| school1       | 1-school1<br>2-school2<br>3-school3                                                                                                                                                                                              |
| group         | 1-obesity<br>2-normal<br>3-lean                                                                                                                                                                                                  |
| AGE           | Age in 1999                                                                                                                                                                                                                      |
| Testos1-4     | testos1-testosterone level in 1999<br>testos2-testosterone level in 2000<br>testos3- testosterone level in 2001<br>testos4-testosterone level in 2002<br>nmol/l                                                                  |
| Estro1-4      | Estro1-estradiol level in 1999<br>Estro1-estradio level in 2000<br>Estro1-estradio level in 2001<br>Estro1-estradio level in 2002<br>pmol/l                                                                                      |
| Height1-4     | Height1-Height in 1999<br>Height2-Height in 2000<br>Height3- Height in 2001<br>Height4-Height in 2002                                                                                                                            |
| Weight1-4     | Weight1-Weight level in 1999<br>Weight2-Weight level in 2000<br>Weight3-Weight level in 2001<br>Weight4-Weight level in 2002                                                                                                     |
| MENSES1-4     | MENSES1-menstruation in 1999<br>testos2-menstruation in 2000<br>testos3- menstruation in 2001<br>testos4-menstruation in 2002<br>1-yes<br>0-no                                                                                   |
| BREAST1-4     | BREAST1-breast development in 1999<br>BREAST2-breast development in 2000<br>BREAST3-breast development in 2001<br>BREAST4-breast development in 2002<br>1-Tanner level1<br>2-Tanner level2<br>3-Tanner level3<br>4-Tanner level4 |
